# Supplementary material for: A phyco-nanobionics biohybrid system for increased carotenoid accumulation inC. sorokinianaUUIND6
Source: Royal Society of Chemistry journal article supplement (doi:10.1039/d3tb00960b), 2023-01-01
Supplement: d3tb00960b1.pdf [file d3tb00960b1.pdf]

**Phyco-nanobionics biohybrid system for increased carotenoids  
accumulation in *C. sorokiniana* UUIND6**

**Bhawna Bisht<sup>a</sup>, Krishna Kumar Jaiswal<sup>b</sup>, Afreen Parveen<sup>a</sup>, Sanjay Kumar<sup>a</sup>, Monu  
Verma<sup>c</sup>, Hyunook Kim<sup>c</sup>, Mikhail S. Vlaskin<sup>d</sup>, Narpinder Singh<sup>a</sup>, Vinod Kumar<sup>a,e\*</sup>**

<sup>a</sup>Algal Research and Bioenergy Laboratory, Department of Food Science and Technology,  
Graphic Era (Deemed to be) University, Dehradun, Uttarakhand, 248002, India

<sup>b</sup>Department of Green Energy Technology, Pondicherry University, Puducherry, 605014,  
India

<sup>c</sup>Water-Energy Nexus Laboratory, Department of Environmental Engineering, University of  
Seoul, Seoul, 02504, Republic of Korea

<sup>d</sup>Joint Institute for High Temperatures of the Russian Academy of Sciences, Moscow,  
117198, Russian Federation

<sup>e</sup>Peoples' Friendship, University of Russia, RUDN University), Moscow 117198, Russian  
Federation

*\*Corresponding Author:*

Dr. Vinod Kumar

Algal Research and Bioenergy Laboratory,  
Department of Food Science and Technology,

Graphic Era (Deemed to be  
University), Dehradun, Uttarakhand,  
248002, India

Email Id: [vinodkdhatwalia@gmail.com](mailto:vinodkdhatwalia@gmail.com)

## FIGURE CAPTIONS

**Fig S1.** Standard calibration curve of H<sub>2</sub>O<sub>2</sub>

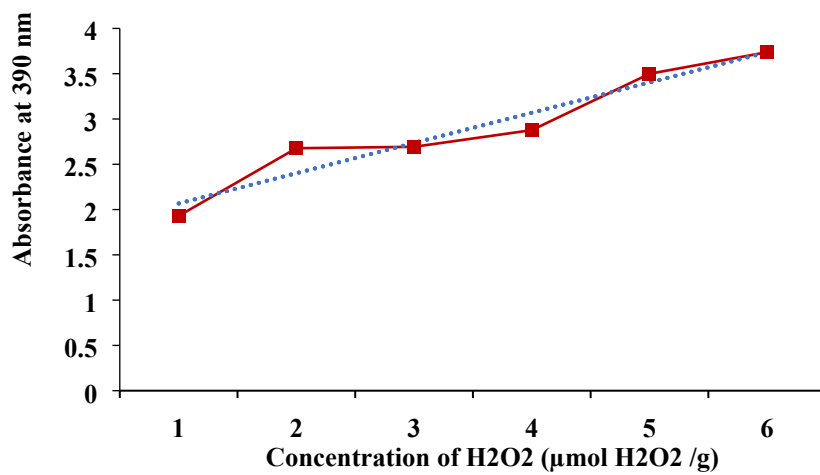

**Fig S1.**

## **TABLE CAPTIONS**

**Table S1.** Potential functional groups within the MB associated with AgNPs using FTIR analysis

**Table S2.** One-way ANOVA on Chl-a yield of microalgae

**Table S3.** One-way ANOVA on Chl-b yield of microalgae

**Table S4.** One-way ANOVA on Chl-a/Chl-b ratio of microalgae

**Table S5.** One-way ANOVA on carotenoid yield of microalgae

**Table S6.** Metabolites detected in the  $^1\text{H-NMR}$  spectra of organic extracts from microalgae, and their respective chemical shifts (in ppm). The  $^1\text{H}$  chemical shifts in bold identify the signal that was integrated for quantitative comparisons. Multiplicity: s, singlet; d, doublet; t, triplet; q, quartet; m, multiplet; dd, doublet of doublets.

**Table S7.**  $^1\text{H-NMR}$  spectra data of pure carotenoids isolated from microalgae (MB-CARs) and standard  $\beta$ -carotene.

**Table S1**

| Wavenumber (cm <sup>-1</sup> ) | Bond                                                               | Functional groups                                              | MB-Ag-0 (Control)            | MB-Ag-1 | MB-Ag-2.5 | MB-Ag-5 |
|--------------------------------|--------------------------------------------------------------------|----------------------------------------------------------------|------------------------------|---------|-----------|---------|
| 3200-3500                      | O-H stretch, intermolecular H-bonded                               | alcohols, phenols                                              | 3421                         | -       | -         | -       |
| 2850-3100                      | C-H stretch<br>=C-H                                                | alkenes, alkanes, aromatics                                    | 2929<br>2851                 | -       | -         | -       |
| 1640-1710                      | C=O stretch<br>-C=C- stretch                                       | $\alpha$ , $\beta$ -unsaturated aldehydes and ketones, alkenes | 1654                         | -       | -         | -       |
| 1475-1600                      | C-C stretch<br>N-O stretch                                         | aromatics, nitro compound                                      | 1530                         | -       | -         | -       |
| 1350-1450                      | C-H bend<br>C-H rock                                               | Alkanes                                                        | 1408                         | -       | -         | -       |
| 1250-1335                      | C-N stretch                                                        | aromatic amines                                                | 1318                         | -       | -         | -       |
| 1020-1250                      | C-N stretch                                                        | aliphatic amines                                               | 1239<br>1161<br>1106<br>1049 | -       | -         | -       |
| 700-1000                       | C-N/ R-O-C/<br>R-O- CH <sub>3</sub><br>stretching/<br>aromatic C-H | protein constituents                                           | 982<br>848<br>702            | -       | -         | -       |
| 500-700                        | C-C stretching                                                     | Aliphatic groups                                               | -                            | 557     | 557       | 557     |

**Table S2**

| <b>Groups</b>       | <b>Count</b> | <b>Sum</b> | <b>Average</b> | <b>Variance</b> | <b>S.D</b> |
|---------------------|--------------|------------|----------------|-----------------|------------|
| Control             | 3            | 11.45      | 3.82           | 0.000933        | 0.03       |
| HMBE-AgNP (1 ppm)   | 3            | 14.28      | 4.76           | 0.0031          | 0.05       |
| HMBE-AgNP (2.5 ppm) | 3            | 16.36      | 5.45           | 0.002533        | 0.05       |
| HMBE-AgNP (5 ppm)   | 3            | 24.62      | 8.21           | 0.002633        | 0.05       |
| HMBE-AgNP (10 ppm)  | 3            | 15.21      | 5.07           | 0.0049          | 0.07       |

  

| <b>Source of Variation</b> | <b>SS</b> | <b>Df</b> | <b>MS</b> | <b>F</b> | <b>P-value</b> | <b>F crit</b> |
|----------------------------|-----------|-----------|-----------|----------|----------------|---------------|
| Between Groups             | 32.66057  | 4         | 8.165143  | 2895.441 | 2.86E-15       | 3.47805       |
| Within Groups              | 0.0282    | 10        | 0.00282   |          |                |               |
| Total                      | 32.68877  | 14        |           |          |                |               |

**Table S3**

| <b>Groups</b>       | <b>Count</b> | <b>Sum</b> | <b>Average</b> | <b>Variance</b> | <b>S.D</b> |
|---------------------|--------------|------------|----------------|-----------------|------------|
| Control             | 3            | 7.28       | 2.43           | 0.000933        | 0.03       |
| HMBE-AgNP (1 ppm)   | 3            | 8.8        | 2.93           | 0.000933        | 0.03       |
| HMBE-AgNP (2.5 ppm) | 3            | 9.15       | 3.05           | 0.0016          | 0.04       |
| HMBE-AgNP (5 ppm)   | 3            | 10.1       | 3.37           | 0.001733        | 0.04       |
| HMBE-AgNP (10 ppm)  | 3            | 10.57      | 3.52           | 0.003033        | 0.06       |

  

| <b>Source of Variation</b> | <b>SS</b> | <b>Df</b> | <b>MS</b> | <b>F</b> | <b>P-value</b> | <b>F crit</b> |
|----------------------------|-----------|-----------|-----------|----------|----------------|---------------|
| Between Groups             | 2.177933  | 4         | 0.544483  | 330.6579 | 1.42E-10       | 3.47805       |
| Within Groups              | 0.016467  | 10        | 0.001647  |          |                |               |
| Total                      | 2.1944    | 14        |           |          |                |               |

**Table S4**

| <b>Groups</b>       | <b>Count</b> | <b>Sum</b> | <b>Average</b> | <b>Variance</b> | <b>S.D</b> |
|---------------------|--------------|------------|----------------|-----------------|------------|
| Control             | 3            | 4.7        | 1.57           | 3.33333E-05     | 0.01       |
| HMBE-AgNP (1 ppm)   | 3            | 4.85       | 1.62           | 0.000533333     | 0.02       |
| HMBE-AgNP (2.5 ppm) | 3            | 5.35       | 1.78           | 0.000133333     | 0.01       |
| HMBE-AgNP (5 ppm)   | 3            | 7.3        | 2.43           | 0.000433333     | 0.02       |
| HMBE-AgNP (10 ppm)  | 3            | 4.3        | 1.43           | 0.000133333     | 0.01       |

  

| <b>Source of Variation</b> | <b>SS</b>   | <b>Df</b> | <b>MS</b>   | <b>F</b>    | <b>P-value</b> | <b>F crit</b> |
|----------------------------|-------------|-----------|-------------|-------------|----------------|---------------|
| Between Groups             | 1.855       | 4         | 0.46375     | 1830.592105 | 2.83E-14       | 3.47805       |
| Within Groups              | 0.002533333 | 10        | 0.000253333 |             |                |               |

Table S5

| Groups              | Count | Sum     | Average | Variance | S.D  |
|---------------------|-------|---------|---------|----------|------|
| Control             | 3     | 662.92  | 221.0   | 18.98613 | 4.36 |
| HMBE-AgNP (1 ppm)   | 3     | 908.5   | 302.8   | 17.72333 | 4.21 |
| HMBE-AgNP (2.5 ppm) | 3     | 1073.35 | 357.8   | 11.12583 | 3.34 |
| HMBE-AgNP (5 ppm)   | 3     | 1372.6  | 457.5   | 6.253333 | 2.5  |
| HMBE-AgNP (10 ppm)  | 3     | 1084.8  | 361.6   | 16.87    | 4.11 |

  

| Source of Variation | SS       | Df | MS       | F       | P-value  | F crit  |
|---------------------|----------|----|----------|---------|----------|---------|
| Between Groups      | 90436.49 | 4  | 22609.12 | 1593.12 | 5.66E-14 | 3.47805 |
| Within Groups       | 141.9173 | 10 | 14.19173 |         |          |         |
| Total               | 90578.4  | 14 |          |         |          |         |

Table S6

| Compound                          | $\delta$ <sup>1</sup> H (multiplicity)                                                                                                                                                                                                                                                                                                                                                 |
|-----------------------------------|----------------------------------------------------------------------------------------------------------------------------------------------------------------------------------------------------------------------------------------------------------------------------------------------------------------------------------------------------------------------------------------|
| Carotenoid 1                      | 6.16 (s), 6.33, 6.40, 6.71                                                                                                                                                                                                                                                                                                                                                             |
| Carotenoid 2                      | 6.67, 6.97                                                                                                                                                                                                                                                                                                                                                                             |
| Lutein                            | 1.00(s), 1.40(dd), 1.60(dd), 1.68(s), 1.69(dd), 1.99(s), 2.26(dd), 3.90(m), 6.33(d), 0.98(s), 1.05(s), 1.44(dd), 1.67(s), 1.95(dd), 3.57(m), 3.64(m), 6.31(d), 1.21(s), 1.63(m), 1.86(s), 2.22(m), 6.63(d)                                                                                                                                                                             |
| Violaxanthin                      | 1.98 (s), 1.97 (s), 1.74 (s), 1.08 (s)                                                                                                                                                                                                                                                                                                                                                 |
| Zeaxanthin                        | 1.98 (s), 1.94 (s), 1.82 (t), 1.33 (s)                                                                                                                                                                                                                                                                                                                                                 |
| Astaxanthin                       | 0.71 (d), 0.74 (d), 0.80 (d), 1.70 (d), 3.57 (s), 3.78 (s), 6.01   119.60, 6.20   119.60, 6.22 (s)   64.60, 8.11 (dd), 8.46 (s)   92.60, 9.25 (s)   99.20, 9.61 (s)   107.10 0.78-0.88   13.60-15.90, 1.16-1.35   21.80-33.50 (total FA), 1.44-1.54   24.20-28.10, 1.90-1.99   26.30 (MUFA), 1.99-2.06   26.30, 2.22-2.33   33.30, 2.71-2.80   24.90 (PUFA), 5.25-5.38   126.80-131.00 |
| Chlorophyll a                     |                                                                                                                                                                                                                                                                                                                                                                                        |
| Fatty acyl (FA) chains            |                                                                                                                                                                                                                                                                                                                                                                                        |
| Glycolipids – galactosyl moieties | 3.25, 3.59, 4.09, 4.63                                                                                                                                                                                                                                                                                                                                                                 |
| Glycolipids – glucosyl moieties   | 3.22, 3.24, 3.53, 3.56, 4.81, 4.87                                                                                                                                                                                                                                                                                                                                                     |
| Glycolipids – glyceryl moieties   | 3.62, 3.81, 4.12, 4.32, 5.10                                                                                                                                                                                                                                                                                                                                                           |
| Linoleic acid                     | 1.28, 2.01, 2.73, 5.32                                                                                                                                                                                                                                                                                                                                                                 |
| Linolenic acid                    | 0.92 (t), 1.28, 2.02, 2.76, 5.33                                                                                                                                                                                                                                                                                                                                                       |

**Table S7**

| <b>Chemical shift (ppm)</b> | <b>Chemical Assignment</b>         | <b>Standard <math>\beta</math>-Carotene</b> | <b>MB-CARs</b> |
|-----------------------------|------------------------------------|---------------------------------------------|----------------|
| 1.0-1.4                     | Other Methylenes                   | +                                           | +              |
| 1.5-1.8                     | Methylenes $\beta$ to the carbonyl | +                                           | +              |
| 1.9-2.1                     | Allylic methylenes                 | +                                           | +              |
| 5.2-5.5                     | Glyceryl and olefinic methine      | +                                           | +              |

+ sign indicates: presence, - sign indicates: absence
